RESEARCH ARTICLE

# Radiation induces changes in toll-like receptors of the uterine cervix of the rat

Marie Françoise Mukanyangezi<sup>1</sup>, Lucie Podmolíková<sup>1,2</sup>, Wurood Al Hydad<sup>1</sup>, Gunnar Tobin<sup>1</sup>, Daniel Giglio<sup>1,3\*</sup>

**1** Department of Pharmacology, Institute of Neuroscience and Physiology, Sahlgrenska Academy at the University of Gothenburg, Gothenburg, Sweden, **2** Department of Medical Biochemistry, Faculty of Medicine, Charles University, Hradec Králové, Czech Republic, **3** Department of Oncology, Institute of Clinical Sciences, Sahlgrenska Academy at the University of Gothenburg, Gothenburg, Sweden

\* [daniel.giglio@pharm.gu.se](mailto:daniel.giglio@pharm.gu.se)

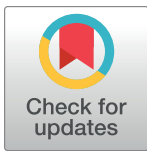

## Abstract

Radiotherapy is an important therapeutic approach against cervical cancer but associated with adverse effects including vaginal fibrosis and dyspareunia. We here assessed the immunological and oxidative responses to cervical irradiation in an animal model for radiation-induced cervicitis. Rats were sedated and either exposed to 20 Gy of ionising radiation given by a linear accelerator or only sedated (controls) and euthanized 1–14 days later. The expressions of toll-like receptors (TLRs) and coupled intracellular pathways in the cervix were assessed with immunohistofluorescence and western blot. Expression of cytokines were analysed with the Bio-Plex Suspension Array System (Bio-Rad). We showed that TLRs 2–9 were expressed in the rat cervix and cervical irradiation induced up-regulation of TLR5, TRIF and NF- $\kappa$ B. In the irradiated cervical epithelium, TLR5 and TRIF were increased in concert with an up-regulation of oxidative stress (8-OHdG) and antioxidant enzymes (SOD-1 and catalase). G-CSF, M-CSF, IL-10, IL-17A, IL-18 and RANTES expressions in the cervix decreased two weeks after cervical irradiation. In conclusion, the rat uterine cervix expresses the TLRs 2–9. Cervical irradiation induces immunological changes and oxidative stress, which could have importance in the development of adverse effects to radiotherapy.

## OPEN ACCESS

**Citation:** Mukanyangezi MF, Podmolíková L, Al Hydad W, Tobin G, Giglio D (2019) Radiation induces changes in toll-like receptors of the uterine cervix of the rat. PLoS ONE 14(4): e0215250. <https://doi.org/10.1371/journal.pone.0215250>

**Editor:** Rasheed Ahmad, Dasman Diabetes Institute, KUWAIT

**Received:** January 3, 2019

**Accepted:** March 28, 2019

**Published:** April 18, 2019

**Copyright:** © 2019 Mukanyangezi et al. This is an open access article distributed under the terms of the [Creative Commons Attribution License](https://creativecommons.org/licenses/by/4.0/), which permits unrestricted use, distribution, and reproduction in any medium, provided the original author and source are credited.

**Data Availability Statement:** All relevant data are within the manuscript and its Supporting Information files.

**Funding:** The present project was sponsored by the Swedish International Development Cooperation Agency (Sida), by the King Gustav V Jubilee Clinical Cancer Research Foundation, Gothenburg, Sweden, and through a scholarship given to M. F. Mukanyangezi by the Swedish Society for Gynecological Oncology (SSGO) sponsored by Roche. The funders had no role in the study design, data collection and analysis,

## Introduction

Cervical cancer is the fourth most common cancer form among women [1]. While earlier stages are treated with surgery, advanced stages of cervical cancer are normally treated with radiotherapy alone or in combination with chemotherapy. The understanding on what happens in the normal tissue surrounding the tumour of the cervix upon exposure of radiation is at present lacking. Radiotherapy may cause vaginal mucosal atrophy, elastosis, fibrosis and vaginal stenosis and as a consequence dyspareunia [2, 3]. While the immune system has been studied in other irradiated tissues such as the colon [4], the lung [5] and the urinary bladder [6], the immune system of the irradiated cervicovaginal tract has not been studied. Pattern recognition receptors (PRRs) are part of the innate immune system and respond to pathogen-associated molecular patterns (PAMPs), which are constituted of microbial pathogens, and

decision to publish or preparation of the manuscript.

**Competing interests:** The authors have declared that no competing interests exist.

damage-associated molecular patterns (DAMPs). Toll-like receptors (TLRs) are an important group of receptors among PRRs. TLRs are expressed in different tissues including the cervix and respond to the exposure of bacteria and viruses thereby activating an immunological response [7]. Studies show that the cervix of the rabbit expresses TLRs 2, 3, 4, 5, 6, 8 and 10 [8]. Activation of TLRs induces intracellular activation of myeloid differentiation primary response 88 (MyD88) and TIR-domain-containing adapter-inducing interferon- $\beta$  (TRIF) and via transcriptional factors (e.g. NF $\kappa$ B) may induce cytokine release [9].

It is tempting to assume that radiation causes the release of antigens from tumour cells and surrounding tissue activating DAMPs such as TLRs [10]. Numerous studies are undergoing to test TLR agonists in the therapy against cancer [11]. The TLR 7/8 agonist imiquimod is used in the therapy of HPV-related intraepithelial neoplasia including of the cervix and vagina [12]. The understanding of the immunological events following irradiation of the cervix could mean discovery of potential targets in the therapy of cervical cancer as well as finding therapeutic approaches to prevent the development of adverse effects to radiotherapy such as fibrosis. Activation of certain immunological pathways may lead to later development of fibrosis as has been demonstrated for radiation-induced dermal fibrosis, colonic fibrosis and pulmonary fibrosis [4, 13, 14]. In an animal model for radiation cystitis, we observed that radiation may suppress TLR4 and immunoregulatory pathways and affect the antioxidative system of the urinary bladder [6, 15]. Therefore, we presently assessed in an animal model how the innate immune system and antioxidative system of the cervix respond to the exposure of high-dose ionising radiation in the early phase following cervical irradiation. The radiation dose of 20 Gy used and the time window of two weeks assessed in the present model were chosen based on our findings in our rat model of radiation cystitis [6].

## Materials and methods

### Uterine cervix irradiation

Sprague-Dawley female rats (200–250 g; n = 49; CD IGS rat, Charles River, Germany) had free access to food and water. On the day of cervix irradiation, rats were sedated with pentobarbitone and medetomidine (50 mg/kg *im* and 10  $\mu$ G/kg *ip*) and placed in the supine position with the legs placed on the abdomen (to keep the legs away from the radiation field). The uterine cervix was then radiated with one fraction of 20 Gy given by a linear accelerator (Varian Medical Systems Inc., Palo Alto; 6 MV). Radiation was given in two side-fields to minimize the exposure of the spinal cord. One dose of 20 Gy corresponds to an equivalent dose of 92 Gy in 2 Gy fractions (assuming  $\alpha/\beta = 3$ ). Control rats were only sedated. Rats were euthanized 1, 3, 7 and 14 days after uterine cervix irradiation by an overdose of pentobarbitone.

### Microscopical examination of cervical specimens

The thickness of the epithelium and the submucosa and the degree of infiltration of granulocytes were estimated in a blindly manner. The average thickness of the epithelium and the submucosa was calculated from nine randomly positions of each cervical specimen. The number of granulocytes in the cervical submucosa was graded 0 to 5 (0 = solitary granulocytes in the submucosa, 3 = 2–3 zones in the submucosa with high concentration of granulocytes, 5 = predominant part of the submucosa with high concentration of granulocytes).

### Immunohistofluorescence

Sections of cervical specimens (6  $\mu$ M) were deparaffinised in xylene and rehydrated in decreasing concentrations of ethanol (99–95%) and tap water and washed in phosphate-buffered

saline (PBS; Life technologies Ltd, Paisley, UK). The sections were boiled for 30 min in citrate buffer (pH 7.5) for antigen retrieval and incubated for two hours with  $\text{CuSO}_4$  solution to quench autofluorescence (Sigma-Aldrich, St. Louis, MO, USA). Unspecific protein binding was blocked by incubating sections for one hour in 5% goat serum (diluted in PBS). Incubation with the primary antibody (diluted in 1% goat serum in PBS; see [S1 Table](#)) occurred overnight at 4°C. The next day the sections were washed in PBS and incubated with the secondary antibody (1:250; 1% goat serum in PBS; see [S1 Table](#)) for one hour. After washes in PBS, sections were dehydrated in increasing concentration of ethanol (95–99%). Prolong Gold Antifade Reagent with DAPI (Life technologies) was applied on the sections and cover glasses were then mounted. The average pixel intensity of antigen staining in one representative area of epithelium, submucosa, smooth muscle and submucosal blood vessel wall in every cervix specimen was measured with Photoshop (version 12.0.4).

### Immunohistochemistry for CD3+ lymphocytes

To detect CD3+ lymphocytes in the cervical tissue, HRP/DAB immunohistochemistry was performed (Abcam; Mouse and Rabbit Specific HRP/DAB (ABC) Detection IHC Kit; ab64264). In brief, after deparaffinization and hydration (see above), the sections were blocked with hydrogen peroxide. Antigen retrieval was then performed as above and protein block was applied on the sections. Incubation with the primary antibody against CD3 occurred overnight at 4°C. Sections were the next day incubated with biotinylated goat anti-polyvalent followed by streptavidin peroxidase followed by applying DAB chromogen mixed with DAB substrate on the sections for 5 min. After counterstaining with Mayer's hematoxylin (Histolab Products AB, Göteborg, Sweden) the sections were washed in tap water and dehydrated in increasing concentrations of ethanol and xylene. Sections were covered with Pertex mounting medium (Histolab Products AB) and cover slips. The average number of CD3+ lymphocytes present in the epithelium and submucosa per three vision fields (x100) was counted in the cervical specimens ( $n = 7$ ).

### Protein estimations and western blot analysis

Cervix specimens were homogenized in homogenization buffer containing 0.1% phosphatase inhibitor cocktail 2 (Sigma-Aldrich) and 0.5% protease inhibitor cocktail (Sigma-Aldrich), centrifuged and the supernatants were recovered. The Pierce BCA Protein Assay Kit (Thermo Scientific, Rockford, IL, USA) was used to determine the concentrations of the protein samples. The protein samples were mixed with NuPAGE LDS Sample Buffer (Life Technologies) and NuPAGE Reducing Agent (Life Technologies) and heated for 10 min at 70°C. Proteins were separated by electrophoresis on NuPAGE 4–12% Bis-Tris gels (Life Technologies) in MOPS buffer (Life technologies Ltd) followed by transferring the proteins onto nitrocellulose membranes (Life Technologies) for one hour at 30 V. The membranes were washed in tris-buffered saline with 0.3% Tween 20 (TBS-T; Sigma-Aldrich) and blocked for one hour with 5% non-fat milk in TBS-T. After washes in TBS-T, incubation with the primary antibody (in TBS-T containing 3% goat serum; see [S1 Table](#)) occurred overnight at 4°C. On the next day, after washes in TBS-T, the membranes were incubated with the secondary antibody (in TBS-T containing 5% non-fat milk; see [S1 Table](#)) for one hour. Signals of binding of the antibodies were developed with Amersham ECL Plus Western Blotting Detection Reagent (GE Healthcare, Little Chalfont, UK) and visualized with the Fujifilm Image Reader LAS-1000 Pro v.2.6 (Stockholm, Sweden). Quantification of pixel intensity was made with the Fujifilm Multi Gauge v3.0 software (Stockholm, Sweden). Membranes were washed in TBS-T, stripped in Restore Western Blot Stripping Buffer (Thermo Fisher Scientific, Rockford, IL, USA) and

washed again in TBS-T. The membranes were then blocked for 60 min in TBS-T containing 5% non-fat milk and incubated then with a new primary antibody followed by the protocol as above.

### Cytokine analysis from cervical specimens

Cytokines were analysed from homogenized cervical tissue with the Bio-Plex Pro Assays according to the instructions of the manufacturer (Bio-Rad Laboratories Inc, Irvine, CA, USA). Erythropoietin (EPO), granulocyte colony-stimulating factor (G-CSF), granulocyte-macrophage (GM)-CSF, Gro/KC (chemokine (C-X-C motif) ligand 1; CXCL1), interferon gamma (IFN- $\gamma$ ), interleukin (IL)-1 $\alpha$ , IL-1 $\beta$ , IL-2, IL-4, IL-5, IL-6, IL-7, IL-10, IL-12p70, IL-13, IL-17A, IL-18, macrophage (M)-CSF, monocyte chemoattractant protein 1 (MCP-1), macrophage inflammatory protein (MIP)-1 $\alpha$  (CCL3), MIP-3 $\alpha$ , regulated on activated, normal T-cell expressed and secreted (RANTES), tumour necrosis factor alpha (TNF- $\alpha$ ) and vascular endothelial growth factor (VEGF) were analysed.

### Statistical analysis

Statistical significance for unpaired data was determined with the Mann-Whitney test. The Kruskal-Wallis test was used when multiple comparisons were made followed by the Dunn's multiple comparison test. Linear regression was performed to assess the relationship between cervical TLR5 expression and the number of days following cervical irradiation and the coefficient of determination (r-squared) was determined. A p-value of 0.05 or less was considered as statistically significant. Data is presented in the form of mean  $\pm$  standard error of the mean if not stated otherwise. Graphs were generated and parameters computed using the GraphPad Prism program 7.0 (GraphPad Software, Inc., San Diego, US).

## Results

### Activation of the innate immune system and anti-oxidation

Histological examination of the cervix showed that irradiation induced oedema in the submucosa and the thickness of the submucosa increased time-dependently after irradiation (at days 7–14 post-irradiation;  $p < 0.001$ ;  $n = 5$ ; [S1 Fig](#)). Granulocytes were particularly expressed in the submucosa and the granulocyte number was not significantly affected by cervical irradiation ([S1 Fig](#)). Neither was the number or distribution of CD3+ lymphocytes in the submucosa or epithelium affected by irradiation ([S2 Fig](#)). Western blot showed the expression of TLRs 2–9 but not the expression of TLR1 in control and irradiated cervical tissue. While TLR1 was not detected with western blot in cervical tissue with two antibodies tested (see [Methods](#)), TLR1 was expressed for example in the rat brain (10.6084/m9.figshare.7886066). An increase in cervical TLR5 expression in response to cervical irradiation occurred and the increase occurred time-dependently ( $p < 0.05$ ;  $n = 6$ ; [Fig 1a](#) and [S3 Fig](#)). The increase in TLR5 occurred in the cervical epithelium ( $p < 0.01$ ;  $n = 7$ ; [Fig 1b](#)). TLRs 2–9 were expressed in normal, non-irradiated, cervical specimens ([S4 Fig](#)).

In general, the epithelium expressed a more intense staining signal for the TLRs than the underlying stroma. TLRs 2–9 were expressed in the epithelium. In the submucosa, TLR2, TLR4, TLR5, TLR6 and TLR9 were expressed. In the smooth muscle TLR2–9 except TLR8 were expressed. TLR4, TLR5, TLR6 and TLR7 were also expressed in blood vessels. MyD88 and TRIF were expressed in the cervical epithelium ([Fig 2a](#)). Western blot analysis showed that TLR downstream molecules TRIF and NF- $\kappa$ B were increased in the irradiated cervix, while MyD88 instead was decreased ([Fig 2b](#)).

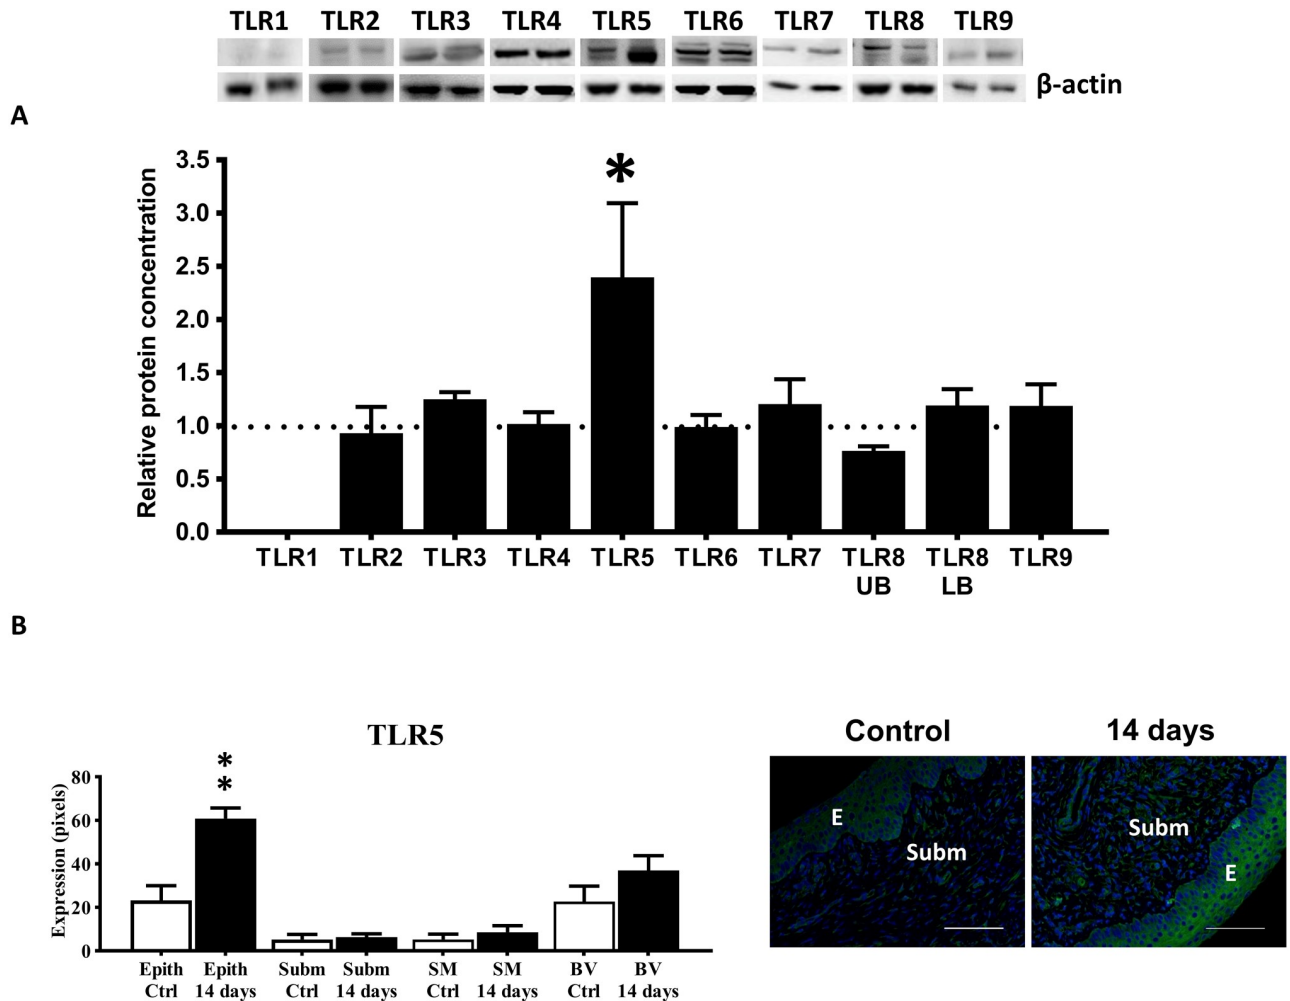

**Fig 1. Expression of TLRs in control and irradiated cervical specimens.** A) Western blot analysis of TLR1 (90 kDa), TLR2 (90 kDa), TLR3 (95 kDa), TLR4 (95 kDa), TLR5 (95 kDa), TLR6 (96 kDa), TLR7 (121 kDa), TLR8 upper band (95 kDa), TLR8 lower band (90 kDa) and TLR9 (100 kDa) in control and irradiated cervixes at day 14 post-irradiation (n = 5–7; expressed as fraction of control cervix expression). B) TLR5 expression in different structures of the cervix (n = 7–8). Representative microphotographs immunostained for TLR5 (green) and DAPI-stained nuclei (blue) of a control and irradiated cervix to the right. *E* indicates epithelium and *Subm* indicates submucosa. Horizontal bars indicate 200  $\mu$ m. \* indicates  $p < 0.05$  between TLR5 expression in control and irradiated cervixes at day 14 post-irradiation and \*\* indicates  $p < 0.01$  between TLR5 epithelial expression in control and irradiated cervixes at day 14 post-irradiation. Vertical bars indicate S.E.M.

<https://doi.org/10.1371/journal.pone.0215250.g001>

8-OHdG, SOD-1, SOD-2 and catalase were expressed in the cervical epithelium and in blood vessels of the cervical submucosa (Figs 3a and 4a). Cervical irradiation induced up-regulation of 8-OHdG, SOD-1 and catalase in the epithelium and in submucosal blood vessels of the cervix (Figs 3a, 3b, 4a and 4b).

### Cytokine expressions after irradiation

G-CSF, M-CSF, IL-10, IL-17A, IL-18 and RANTES expressions in the cervix decreased two weeks after cervical irradiation ( $p < 0.001-0.05$ ; n = 10–16; Tables 1 and 2). GM-CSF and MCP-1 tended to decrease but significance was not attained ( $p = 0.05$  and  $p = 0.06$ , respectively; n = 16; Tables 1 and 2).

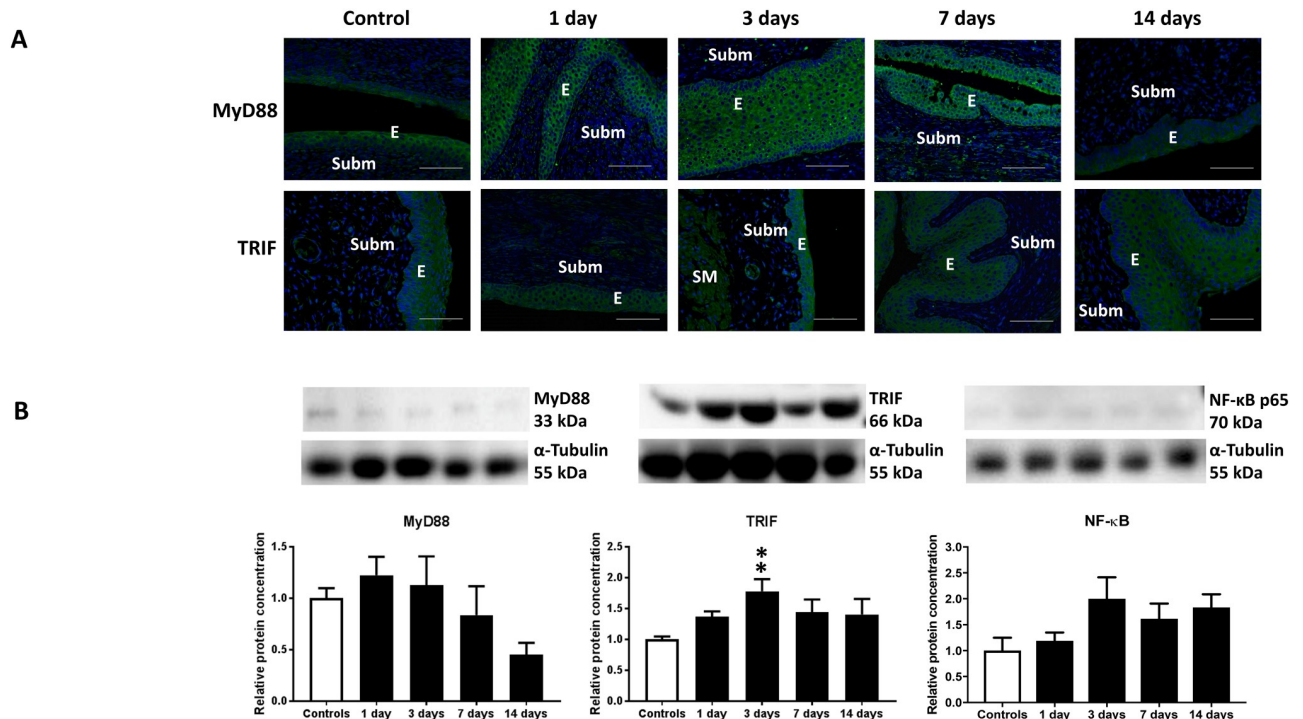

**Fig 2. Activation of TLR-connected signaling pathways in response to cervical irradiation.** A) Representative microphotographs immunostained for MyD88 (green), TRIF (green) and DAPI-stained nuclei (blue) of control and irradiated cervixes (days 1–14 post-irradiation). *E* indicates epithelium, *Subm* indicates submucosa and *SM* indicates smooth muscle. Horizontal bars indicate 200 μm. B) Western blot analysis of MyD88, TRIF and NF-κB expression in control and irradiated cervixes (n = 6). \*\* indicates p<0.01 between TRIF expression in control and irradiated cervixes at day 3 post-irradiation. Vertical bars indicate S.E.M.

<https://doi.org/10.1371/journal.pone.0215250.g002>

## Discussion

In our study we wondered how radiation affects the immunological system of the uterine cervix with focus on the expression of TLRs. The expression of TLRs (TLR1–9) in the female reproductive tract has been demonstrated in previous studies [7, 16–18]. It is also established that TLR stimulation may boost radiation-induced immune responses in cancer [19]. However, knowledge about how radiation affects the expression of TLRs in the normal cervical tissue is at present lacking. The most apparent finding of our study was that cervical irradiation induced increases of TLR5 in the epithelium concomitant with changes in cervical levels of TLR adaptor molecules MyD88, TRIF and NF-κB. The cervical epithelium expressed TLRs 2–9, which indicates that the cervical epithelium may respond to a high number of PAMPs and DAMPs. In the epithelium, TLR4, TLR6 and TLR9 were more expressed than TLR2, TLR3, TLR5, TLR7 and TLR8. Previous studies on cervical human epithelial cell lines showed the presence of all TLRs (1–9), where stimulation of TLR2, TLR3, TLR5 and TLR6 induced the release of cytokines [20]. The myometrium expresses TLR2, TLR3 and TLR5 and stimulation of these TLRs may induce the release of pro-inflammatory and pro-labour mediators [21–23].

TLRs (such as TLR2, TLR4 and TLR5) may use the MyD88/IRAK/NF-κB signal and the TRIF transduction pathways. Our data show that TRIF and NF-κB increased while MyD88 decreased in the irradiated cervix. The increase in TRIF appeared in the epithelium concomitant with the up-regulation of TLR5. Studies show that TLR5 may interact with the TRIF pathway in the gut epithelium [24]. TLR5 may mitigate radiation-induced damage in the irradiated head and neck area of the mouse [25]. TLR5 agonists may also reduce apoptosis after

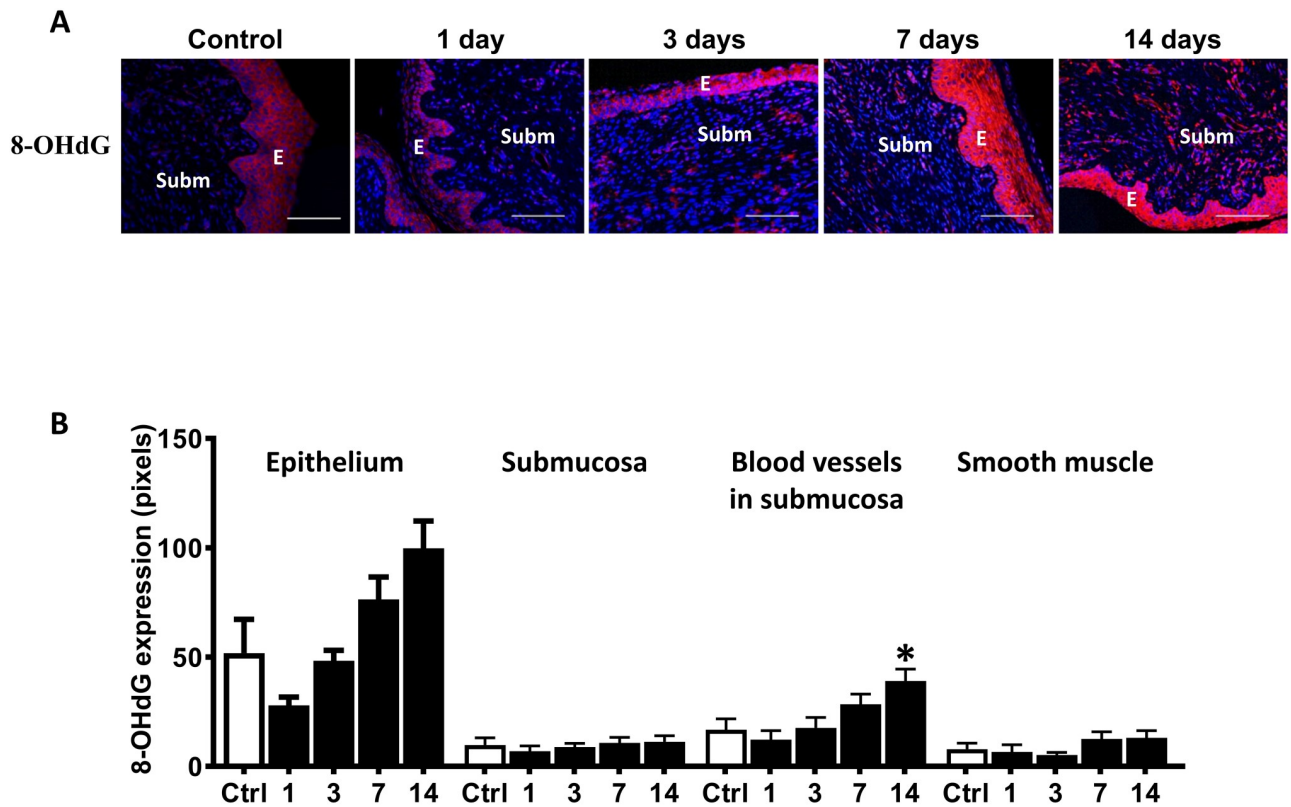

**Fig 3. Increase in oxidative stress in response to cervical irradiation.** A) Representative microphotographs immunostained for 8-OHdG (red) and DAPI-stained nuclei (blue) of control and irradiated cervixes (at days 1–14 post-irradiation). B) 8-OHdG expression in different structures of the cervix (n = 5–10). *E* indicates epithelium and *Subm* indicates submucosa. Horizontal bars indicate 200  $\mu$ m. \* indicates  $p < 0.05$  between 8-OHdG expression in submucosal blood vessels of control and irradiated cervixes at day 14 post-irradiation. Vertical bars indicate S.E.M.

<https://doi.org/10.1371/journal.pone.0215250.g003>

irradiation of the gut thereby improving tissue remodelling after rectal irradiation [26, 27]. The TLR5 agonist flagellin protects mice exposed to a lethal dose of whole-body  $\gamma$ -irradiation via MyD88 dependent pathways [28]. Radioprotective effects have also been shown to be generated via other TLRs such as TLR2, TLR3, TLR4 and TLR9 [29].

Our study showed that oxidative stress (reflected by 8-OHdG staining) increased successively till 14 days after cervical irradiation, while SOD-1 and catalase increased in the cervical tissue already 24 hours after cervical irradiation. Changes in oxidative stress and antioxidants occurred particularly in the epithelium and in the submucosal blood vessels of the cervix. The present findings are in line with previous reports showing that oxidative stress and anti-oxidative responses appear particularly in the urothelium and in submucosal blood vessels 28 days following irradiation of the rat urinary bladder [30]. Our data may indicate that oxidative stress induced by cervical irradiation activated TLR5 and TLR-connected downstream molecules TRIF and NF- $\kappa$ B thereby mitigating oxidative stress via the release of antioxidants SOD-1 and catalase in the cervical tissue.

Irradiation induced edema in the cervical submucosa, however, irradiation did not affect the distribution and number of granulocytes or lymphocytes in the cervix. The dominant effect on the cervical tissue 14 days following irradiation was instead an anti-inflammatory response reflected by a reduction in important pro-inflammatory cytokines and chemokines. IL-17 was decreased concomitant with a decrease in G-CSF, M-CSF and IL-10 levels in the cervix. While

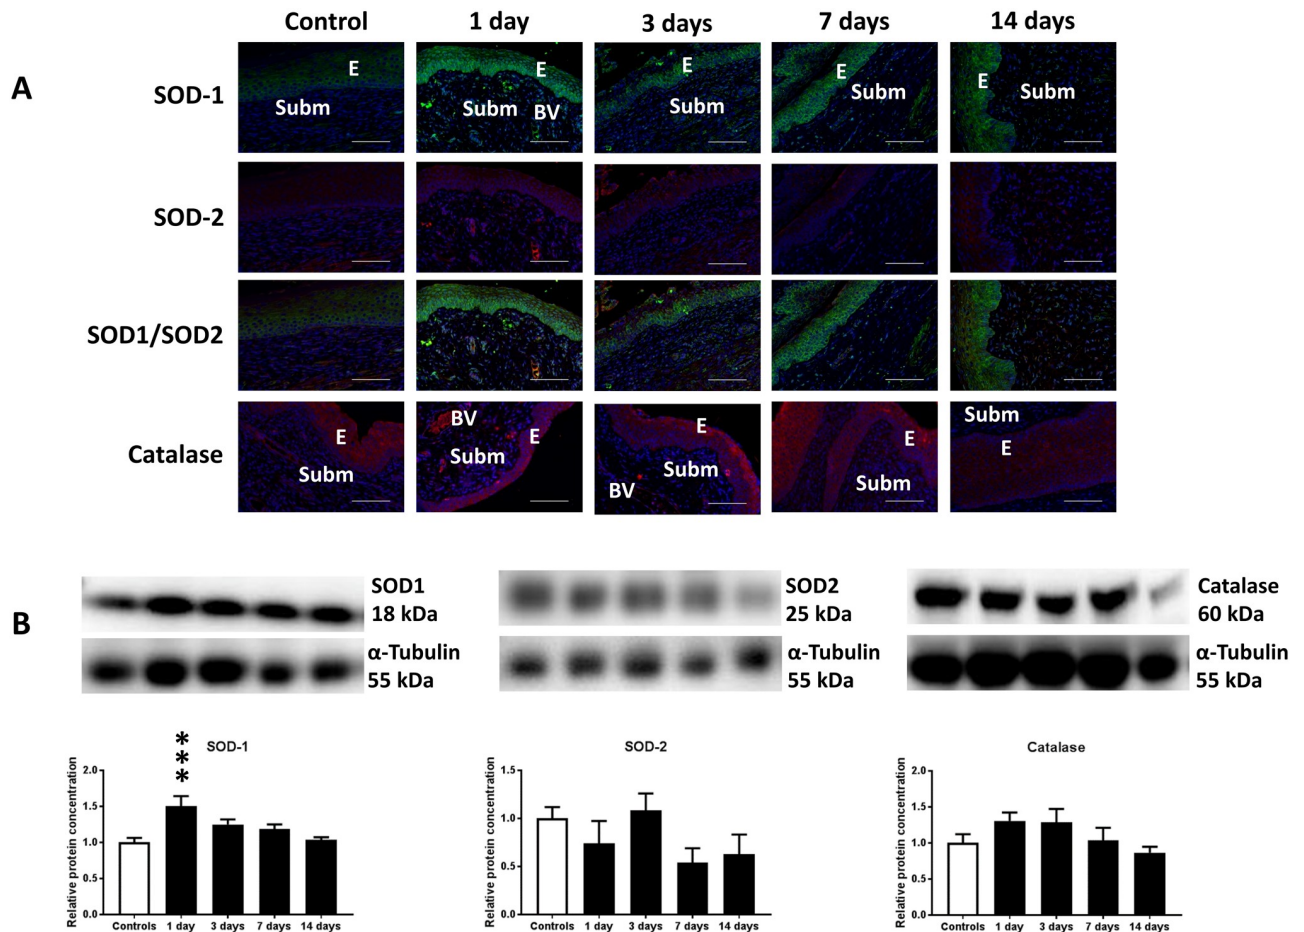

**Fig 4. Increases in antioxidants in response to cervical irradiation.** A) Representative microphotographs immunostained for SOD-1 (green), SOD-2 (red), merged SOD-1/SOD-2 (third row), catalase (red) and DAPI-stained nuclei (blue) of control and irradiated cervixes (days 1–14 post-irradiation). *E* indicates epithelium, *Subm* indicates submucosa and *BV* indicates blood vessel. Horizontal bars indicate 200  $\mu$ m. B) Western blot analysis of SOD-1, SOD-2 and catalase expression in control and irradiated cervixes (days 1–14 post-irradiation; n = 6). \*\* indicates  $p < 0.01$  between SOD-1 expression in control and irradiated cervixes at day 1 post-irradiation. Vertical bars indicate S.E.M.

<https://doi.org/10.1371/journal.pone.0215250.g004>

we only measured the level of cytokines on day 14 following cervical irradiation we do not know if the suppression of cytokines was preceded by an increase in cytokines at an earlier time point. However, the present findings are in line with studies showing that pro-inflammatory mediators are reduced 14 days following urinary bladder irradiation [6, 30]. IL-17 plays an important role in the female genital tract and may be released by Th17 cells and mucosal-associated invariant T (MAIT) cells [31, 32]. Our findings with a reduced IL-17 in response to cervical irradiation may indicate that radiation may lead to a weaker response to pathogens. An imbalance between Th1 and Th2 cytokines may also favour the development of adverse functional side effects to radiation and fibrosis. A number of studies have shown that Th17 cells and IL-17 play important roles in the development of radiation-induced functional disorders and fibrosis, e.g., radiation-induced proctitis [4], liver fibrosis [33, 34] and radiation-induced pulmonary fibrosis [35, 36]. Interestingly, IL-10 and IL-17 levels in bronchoalveolar lavage after pulmonary irradiation were shown to be inversely correlated to the severity of pulmonary fibrosis [35]. Speculatively, our findings of reduced levels of IL-10 and IL-17 may indicate that a pro-fibrotic micro-environment may have been developed in the cervix. The



**Table 1. Cytokine expressions in control and irradiated cervical specimens.**

|                         | EPO        | G-CSF         | M-CSF         | GM-CSF     | GRO/KC     | IL-1 $\alpha$ | IL-1 $\beta$ | IL-7       | IL-10         |
|-------------------------|------------|---------------|---------------|------------|------------|---------------|--------------|------------|---------------|
| <b>CONTROL</b>          |            |               |               |            |            |               |              |            |               |
| Median:                 | 9.94       | 1.91          | 8.16          | 6.98       | 15.97      | 61.07         | 46.28        | 12.02      | 388.6         |
| Mean:                   | 17.43      | 2.116         | 9.33          | 6.883      | 30.94      | 126.1         | 46.23        | 21.79      | 502.6         |
| SD:                     | 20.43      | 1.107         | 4.15          | 1.87       | 35.27      | 137.2         | 33.29        | 30.01      | 263.0         |
| Min-Max:                | 4.92–76.9  | 1.05–4.94     | 5.38–20.98    | 2.99–10.94 | 6.26–130.9 | 4.65–486.2    | 2.65–118.6   | 0.92–126.2 | 278.1–1069    |
| N:                      | 16         | 16            | 16            | 16         | 16         | 16            | 16           | 16         | 16            |
| <b>IRRADIATED</b>       |            |               |               |            |            |               |              |            |               |
| Median:                 | 8.29       | 1.05          | 5.88          | 5.83       | 13.56      | 44.61         | 29.275       | 6.5        | 278.14        |
| Mean:                   | 14.36      | 1.156         | 5.823         | 5.861      | 22.25      | 210.2         | 40.59        | 12.18      | 307.2         |
| SD:                     | 13.35      | 0.2465        | 1.731         | 1.44       | 23.00      | 410.3         | 36.84        | 15.17      | 112.4         |
| Min-Max:                | 4.92–53.14 | 1.05–1.91     | 2.32–8.61     | 2.86–8.96  | 6.26–81.33 | 4.2–1331      | 2.65–134.1   | 0.92–58.22 | 278.1–713.5   |
| N:                      | 16         | 16            | 16            | 16         | 16         | 16            | 16           | 16         | 15            |
| Fold change (decrease): | 1.20       | <b>1.82</b>   | <b>1.39</b>   | 1.20       | 1.18       | 1.37          | 1.58         | 1.85       | <b>1.40</b>   |
| P-value:                | 0.7088     | <b>0.0006</b> | <b>0.0025</b> | 0.0523     | 0.7874     | 0.4619        | 0.5198       | 0.2029     | <b>0.0019</b> |

Cytokine concentrations (pg/ml) of cervical tissue homogenates of control and irradiated cervixes day 14 post-irradiation. SD = standard deviation, N = number of samples/animals.

<https://doi.org/10.1371/journal.pone.0215250.t001>

development of fibrosis seems, however, to take time since we could not either observe fibrosis in the rat cervical tissue 28 days after cervical irradiation (unpublished data).

The understanding of how the uterine cervical tissue responds to radiotherapy is at present scarce. We here assessed the different components in the innate immune system of the uterine cervix and our study gives insight in the early events following cervical irradiation. This could have importance for how to intervene to prevent the development of fibrosis in the female

**Table 2. Cytokine expressions in control and irradiated cervical specimens.**

|                         | IL-17A                                                                  | IL-18         | MCP-1      | MIP-1 $\alpha$ | RANTES        | TNF- $\alpha$ | VEGF        |
|-------------------------|-------------------------------------------------------------------------|---------------|------------|----------------|---------------|---------------|-------------|
| <b>CONTROL</b>          |                                                                         |               |            |                |               |               |             |
| Median:                 | 2.14                                                                    | 2.92          | 23.26      | 2.19           | 5.55          | 18.78         | 72.42       |
| Mean:                   | 2.73                                                                    | 4.92          | 24.14      | 2.81           | 7.86          | 20.37         | 158.2       |
| SD:                     | 1.67                                                                    | 4.08          | 14.25      | 1.39           | 6.69          | 9.55          | 198.8       |
| Min-Max:                | 1.25–7.17                                                               | 1.39–1185     | 4.14–56.21 | 1.85–6.39      | 1.51–20.51    | 6.23–36.54    | 21.12–799.6 |
| N:                      | 16                                                                      | 16            | 16         | 16             | 16            | 16            | 16          |
| <b>IRRADIATED</b>       |                                                                         |               |            |                |               |               |             |
| Median:                 | 1.25                                                                    | 1.39          | 14.18      | 1.85           | 1.51          | 20.55         | 35.93       |
| Mean:                   | 3.17                                                                    | 1.80          | 15.05      | 2.53           | 4.47          | 19.1          | 128.7       |
| SD:                     | 7.04                                                                    | 1.54          | 8.304      | 1.61           | 5.26          | 6.13          | 224.4       |
| Min-Max:                | 1.25–29.53                                                              | 1.39–7.56     | 4.14–31.88 | 1.85–7.66      | 1.51–18.43    | 9.38–28.54    | 8.5–850.4   |
| N:                      | 16                                                                      | 16            | 16         | 16             | 16            | 16            | 16          |
| Fold change (decrease): | <b>1.71</b>                                                             | <b>2.10</b>   | 1.64       | 1.18           | <b>3.68</b>   | 0.91          | 2.02        |
| P-value:                | <b>0.006</b>                                                            | <b>0.0051</b> | 0.0574     | 0.218          | <b>0.0447</b> | 0.8451        | 0.1306      |
| <b>Not detected</b>     | IFN- $\gamma$ , IL-2, IL-4, IL-5, IL-6, IL-12p70, IL-13, MIP-3 $\alpha$ |               |            |                |               |               |             |

Cytokine concentrations (pg/ml) of cervical tissue homogenates of control and irradiated cervixes day 14 post-irradiation. SD = standard deviation, N = number of samples/animals.

<https://doi.org/10.1371/journal.pone.0215250.t002>

pelvic area. Whether targeting TLRs or other key elements in the innate immune system may alleviate adverse effects to radiotherapy should be assessed in future studies.

## Conclusions

The present study shows that the rat uterine cervix expresses the TLRs 2–9. By exposing the rat cervix to radiation, TLR5 was activated together with an up-regulation of oxidative stress and antioxidative responses concomitant with a reduction in important pro-inflammatory cytokines.

## Supporting information

**S1 Fig. Morphometry and granulocytes in control and irradiated cervixes.**

(TIF)

**S2 Fig. CD3+ cells in in control and irradiated cervical specimens.**

(TIF)

**S3 Fig. TLR5 expression in control and irradiated cervical specimens.**

(TIF)

**S4 Fig. Expressions of TLRs 2–9 in control and irradiated cervical specimens.**

(TIF)

**S1 Table. Information on antibodies used for immunohistochemistry and western blot.**

(DOCX)

## Acknowledgments

The authors are grateful to radiation oncology nurse Mohammadreza Abdolalian, Sahlgrenska University hospital, Göteborg, Sweden, for assistance during irradiation of the rats and to Anna-Karin Östberg, Institute of Odontology, University of Gothenburg, for help with Bioplex analysis. The authors are also thankful to Histo-Center, Västra Frölunda, Sweden, for help with tissue preparations.

## Author Contributions

**Conceptualization:** Marie Françoise Mukanyangezi, Gunnar Tobin, Daniel Giglio.

**Data curation:** Marie Françoise Mukanyangezi, Lucie Podmolíková, Wurood Al Hydad, Daniel Giglio.

**Formal analysis:** Marie Françoise Mukanyangezi, Lucie Podmolíková, Wurood Al Hydad, Daniel Giglio.

**Funding acquisition:** Marie Françoise Mukanyangezi, Gunnar Tobin, Daniel Giglio.

**Investigation:** Marie Françoise Mukanyangezi, Lucie Podmolíková, Wurood Al Hydad, Gunnar Tobin, Daniel Giglio.

**Methodology:** Marie Françoise Mukanyangezi, Lucie Podmolíková.

**Project administration:** Gunnar Tobin, Daniel Giglio.

**Resources:** Daniel Giglio.

**Supervision:** Gunnar Tobin, Daniel Giglio.

**Validation:** Marie Françoise Mukanyangezi, Lucie Podmolíková, Wurood Al Hydad, Daniel Giglio.

**Writing – original draft:** Marie Françoise Mukanyangezi, Daniel Giglio.

**Writing – review & editing:** Marie Françoise Mukanyangezi, Lucie Podmolíková, Wurood Al Hydad, Gunnar Tobin, Daniel Giglio.

## References

1. Ferlay J, Soerjomataram I, Dikshit R, Eser S, Mathers C, Rebelo M, et al. Cancer incidence and mortality worldwide: sources, methods and major patterns in GLOBOCAN 2012. *Int J Cancer*. 2015; 136(5): E359–86. Epub 2014/09/16. <https://doi.org/10.1002/ijc.29210> PMID: 25220842.
2. Pfaendler KS, Wenzel L, Mechanic MB, Penner KR. Cervical cancer survivorship: long-term quality of life and social support. *Clin Ther*. 2015; 37(1):39–48. Epub 2015/01/17. <https://doi.org/10.1016/j.clinthera.2014.11.013> PMID: 25592090.
3. Hofsjö A, Bohm-Starke N, Blomgren B, Jahren H, Steineck G, Bergmark K. Radiotherapy-induced vaginal fibrosis in cervical cancer survivors. *Acta Oncol*. 2017; 56(5):661–6. Epub 2017/01/14. <https://doi.org/10.1080/0284186X.2016.1275778> PMID: 28084859.
4. Bessout R, Demarquay C, Moussa L, Rene A, Doix B, Benderitter M, et al. TH17 predominant T-cell responses in radiation-induced bowel disease are modulated by treatment with adipose-derived mesenchymal stromal cells. *J Pathol*. 2015; 237(4):435–46. Epub 2015/07/17. <https://doi.org/10.1002/path.4590> PMID: 26177977.
5. Sohn SH, Lee JM, Park S, Yoo H, Kang JW, Shin D, et al. The inflammasome accelerates radiation-induced lung inflammation and fibrosis in mice. *Environ Toxicol Pharmacol*. 2015; 39(2):917–26. Epub 2015/03/26. <https://doi.org/10.1016/j.etap.2015.02.019> PMID: 25805627.
6. Giglio D, Wasen C, Molne J, Suchy D, Swanpalmer J, Jabonero Valbuena J, et al. Downregulation of toll-like receptor 4 and IL-6 following irradiation of the rat urinary bladder. *Clin Exp Pharmacol Physiol*. 2016; 43(7):698–705. Epub 2016/04/28. <https://doi.org/10.1111/1440-1681.12583> PMID: 27117224.
7. Hart KM, Murphy AJ, Barrett KT, Wira CR, Guyre PM, Pioli PA. Functional expression of pattern recognition receptors in tissues of the human female reproductive tract. *Journal of reproductive immunology*. 2009; 80(1–2):33–40. Epub 2009/05/02. <https://doi.org/10.1016/j.jri.2008.12.004> PMID: 19406482.
8. Chen C, Zibiao H, Ming Z, Shiyi C, Ruixia L, Jie W, et al. Expression pattern of Toll-like receptors (TLRs) in different organs and effects of lipopolysaccharide on the expression of TLR 2 and 4 in reproductive organs of female rabbit. *Dev Comp Immunol*. 2014; 46(2):341–8. <https://doi.org/10.1016/j.dci.2014.05.008> PMID: 24858029.
9. Jeong E, Lee JY. Intrinsic and extrinsic regulation of innate immune receptors. *Yonsei Med J*. 2011; 52(3):379–92. Epub 2011/04/14. PMID: 21488180.
10. Marabelle A, Filatenkov A, Sagiv-Barfi I, Kohrt H. Radiotherapy and Toll-Like Receptor Agonists. *Semin Radiat Oncol*. 2015; 25(1):34–9. <https://doi.org/10.1016/j.semradonc.2014.07.006> PMID: 25481264.
11. Seya T, Shime H, Takeda Y, Tatematsu M, Takashima K, Matsumoto M. Adjuvant for vaccine immunotherapy of cancer—focusing on Toll-like receptor 2 and 3 agonists for safely enhancing antitumor immunity. *Cancer Sci*. 2015; 106(12):1659–68. Epub 2015/09/24. <https://doi.org/10.1111/cas.12824> PMID: 26395101.
12. de Witte CJ, van de Sande AJ, van Beekhuizen HJ, Koenen MM, Kruse AJ, Gerestein CG. Imiquimod in cervical, vaginal and vulvar intraepithelial neoplasia: a review. *Gynecol Oncol*. 2015; 139(2):377–84. Epub 2015/09/04. <https://doi.org/10.1016/j.ygyno.2015.08.018> PMID: 26335596.
13. Buttner C, Skupin A, Reimann T, Rieber EP, Unteregger G, Geyer P, et al. Local production of interleukin-4 during radiation-induced pneumonitis and pulmonary fibrosis in rats: macrophages as a prominent source of interleukin-4. *Am J Respir Cell Mol Biol*. 1997; 17(3):315–25. Epub 1997/10/06. <https://doi.org/10.1165/ajrcmb.17.3.2279> PMID: 9308918.
14. Flanders KC, Sullivan CD, Fujii M, Sowers A, Anzano MA, Arabshahi A, et al. Mice lacking Smad3 are protected against cutaneous injury induced by ionizing radiation. *Am J Pathol*. 2002; 160(3):1057–68. Epub 2002/03/14. [https://doi.org/10.1016/S0002-9440\(10\)64926-7](https://doi.org/10.1016/S0002-9440(10)64926-7) PMID: 11891202.
15. Oscarsson N, Ny L, Molne J, Lind F, Ricksten SE, Seeman-Lodding H, et al. Hyperbaric oxygen treatment reverses radiation induced pro-fibrotic and oxidative stress responses in a rat model. *Free Radic Biol Med*. 2017; 103:248–55. Epub 2016/12/31. <https://doi.org/10.1016/j.freeradbiomed.2016.12.036> PMID: 28034833.

16. Pioli PA, Amiel E, Schaefer TM, Connolly JE, Wira CR, Guyre PM. Differential expression of Toll-like receptors 2 and 4 in tissues of the human female reproductive tract. *Infection and immunity*. 2004; 72(10):5799–806. Epub 2004/09/24. <https://doi.org/10.1128/IAI.72.10.5799-5806.2004> PMID: 15385480.
17. Andersen JM, Al-Khairy D, Ingalls RR. Innate immunity at the mucosal surface: role of toll-like receptor 3 and toll-like receptor 9 in cervical epithelial cell responses to microbial pathogens. *Biol Reprod*. 2006; 74(5):824–31. Epub 2006/01/20. <https://doi.org/10.1095/biolreprod.105.048629> PMID: 16421230.
18. Ghasemi N, Amjadi F, Salehi E, Shakeri M, Aflatoonian A, Aflatoonian R. Expression of Toll-like receptors 7–10 in human fallopian tubes. *Iranian Journal of Reproductive Medicine*. 2014; 12(6):389–94. PMID: 25071846
19. Scholch S, Rauber C, Weitz J, Koch M, Huber PE. TLR activation and ionizing radiation induce strong immune responses against multiple tumor entities. *Oncoimmunology*. 2015; 4(11):e1042201. <https://doi.org/10.1080/2162402X.2015.1042201> PMID: 26451314.
20. Herbst-Kralovetz MM, Quayle AJ, Ficarra M, Greene S, Rose WA 2nd, Chesson R, et al. Quantification and comparison of toll-like receptor expression and responsiveness in primary and immortalized human female lower genital tract epithelia. *Am J Reprod Immunol*. 2008; 59(3):212–24. <https://doi.org/10.1111/j.1600-0897.2007.00566.x> PMID: 18201283.
21. Liong S, Lappas M. The Stress-responsive Heme Oxygenase (HO)-1 Isoenzyme is Increased in Labouring Myometrium where it Regulates Contraction-associated Proteins. *Am J Reprod Immunol*. 2015; 74(1):62–76. Epub 2015/02/07. <https://doi.org/10.1111/aji.12366> PMID: 25656973.
22. Lim R, Barker G, Lappas M. The TLR2 ligand FSL-1 and the TLR5 ligand Flagellin mediate pro-inflammatory and pro-labour response via MyD88/IRAK4/NF-kappaB-dependent signalling. *Am J Reprod Immunol*. 2014; 71(5):401–17. Epub 2014/03/19. <https://doi.org/10.1111/aji.12229> PMID: 24635133.
23. Lim R, Barker G, Lappas M. TLR2, TLR3 and TLR5 regulation of pro-inflammatory and pro-labour mediators in human primary myometrial cells. *J Reprod Immunol*. 2017; 122:28–36. Epub 2017/08/28. <https://doi.org/10.1016/j.jri.2017.08.004> PMID: 28844021.
24. Choi YJ, Im E, Chung HK, Pothoulakis C, Rhee SH. TRIF mediates Toll-like receptor 5-induced signaling in intestinal epithelial cells. *J Biol Chem*. 2010; 285(48):37570–8. <https://doi.org/10.1074/jbc.M110.158394> PMID: 20855887.
25. Toshkov IA, Gleiberman AS, Mett VL, Hutson AD, Singh AK, Gudkov AV, et al. Mitigation of Radiation-Induced Epithelial Damage by the TLR5 Agonist Entolimod in a Mouse Model of Fractionated Head and Neck Irradiation. *Radiat Res*. 2017; 187(5):570–80. Epub 2017/03/23. <https://doi.org/10.1667/RR14514.1> PMID: 28323577.
26. Linard C, Strup-Perrot C, Lacave-Lapalun JV, Benderitter M. Flagellin preconditioning enhances the efficacy of mesenchymal stem cells in an irradiation-induced proctitis model. *J Leukoc Biol*. 2016; 100(3):569–80. Epub 2016/03/20. <https://doi.org/10.1189/jlb.3A0915-393R> PMID: 26992430.
27. Burdelya LG, Krivokrysenko VI, Tallant TC, Strom E, Gleiberman AS, Gupta D, et al. An agonist of toll-like receptor 5 has radioprotective activity in mouse and primate models. *Science*. 2008; 320(5873):226–30. Epub 2008/04/12. <https://doi.org/10.1126/science.1154986> PMID: 18403709.
28. Vijay-Kumar M, Aitken JD, Sanders CJ, Frias A, Sloane VM, Xu J, et al. Flagellin treatment protects against chemicals, bacteria, viruses, and radiation. *J Immunol*. 2008; 180(12):8280–5. Epub 2008/06/05. PMID: 18523294.
29. Ratikan JA, Micewicz ED, Xie MW, Schaefer D. Radiation takes its Toll. *Cancer Lett*. 2015; 368(2):238–45. <https://doi.org/10.1016/j.canlet.2015.03.031> PMID: 25819030.
30. Oscarsson N, Ny L, Molne J, Lind F, Ricksten SE, Seeman-Lodding H, et al. Hyperbaric oxygen treatment reverses radiation induced pro-fibrotic and oxidative stress responses in a rat model. *Free Radic Biol Med*. 2016; 103:248–55. <https://doi.org/10.1016/j.freeradbiomed.2016.12.036> PMID: 28034833.
31. Gibbs A, Leeansyah E, Introini A, Paquin-Proulx D, Hasselrot K, Andersson E, et al. MAIT cells reside in the female genital mucosa and are biased towards IL-17 and IL-22 production in response to bacterial stimulation. *Mucosal Immunol*. 2017; 10(1):35–45. Epub 2016/04/07. <https://doi.org/10.1038/mi.2016.30> PMID: 27049062.
32. Masson L, Salkinder AL, Olivier AJ, McKinnon LR, Gamielidien H, Misana K, et al. Relationship between female genital tract infections, mucosal interleukin-17 production and local T helper type 17 cells. *Immunology*. 2015; 146(4):557–67. Epub 2015/08/25. <https://doi.org/10.1111/imm.12527> PMID: 26302175.
33. Milosavljevic N, Gazdic M, Simovic Markovic B, Arsenijevic A, Nurkovic J, Dolicanin Z, et al. Mesenchymal stem cells attenuate liver fibrosis by suppressing Th17 cells—an experimental study. *Transpl Int*. 2017. Epub 2017/08/15. <https://doi.org/10.1111/tri.13023> PMID: 28805262.
34. Wang B, Liang S, Wang Y, Zhu XQ, Gong W, Zhang HQ, et al. Th17 down-regulation is involved in reduced progression of schistosomiasis fibrosis in ICOSL KO mice. *PLoS Negl Trop Dis*. 2015; 9(1):e0003434. Epub 2015/01/16. <https://doi.org/10.1371/journal.pntd.0003434> PMID: 25590646.

35. Paun A, Kunwar A, Haston CK. Acute adaptive immune response correlates with late radiation-induced pulmonary fibrosis in mice. *Radiat Oncol*. 2015; 10:45. Epub 2015/04/19. <https://doi.org/10.1186/s13014-015-0359-y> PMID: 25889053.
36. Paun A, Bergeron ME, Haston CK. The Th1/Th17 balance dictates the fibrosis response in murine radiation-induced lung disease. *Sci Rep*. 2017; 7(1):11586. Epub 2017/09/16. <https://doi.org/10.1038/s41598-017-11656-5> PMID: 28912510.
